# Supplementary material for: Light-induced water oxidation by polymorphs of the Zn–Co–Ni oxide spinel catalyst: a comparative study
Source: Royal Society of Chemistry journal article supplement (doi:10.1039/c8se00536b), 2019-01-01
Supplement: c8se00536b1.pdf [file c8se00536b1.pdf]

**Electronic supplementary information**

**Light-induced water oxidation by polymorphs of Zn-Co-Ni Oxide spinel  
catalyst: A comparative study**

Rahul Sakla,<sup>a#</sup> Rahul Kaushik,<sup>a#</sup> Vijay Kumar,<sup>b</sup> D. Amilan Jose,<sup>a</sup> Amrita Ghosh\*<sup>a</sup>  
and C. R. Mariappan\*<sup>b</sup>

<sup>a</sup>Department of Chemistry, NIT-Kurukshetra, Kurukshetra-136119, Haryana, India.  
Email: [amritaghosh2003@gmail.com](mailto:amritaghosh2003@gmail.com)

<sup>b</sup>Department of Physics, NIT-Kurukshetra, Kurukshetra-136119, Haryana, India.  
Email: [crmari2005@yahoo.com](mailto:crmari2005@yahoo.com)

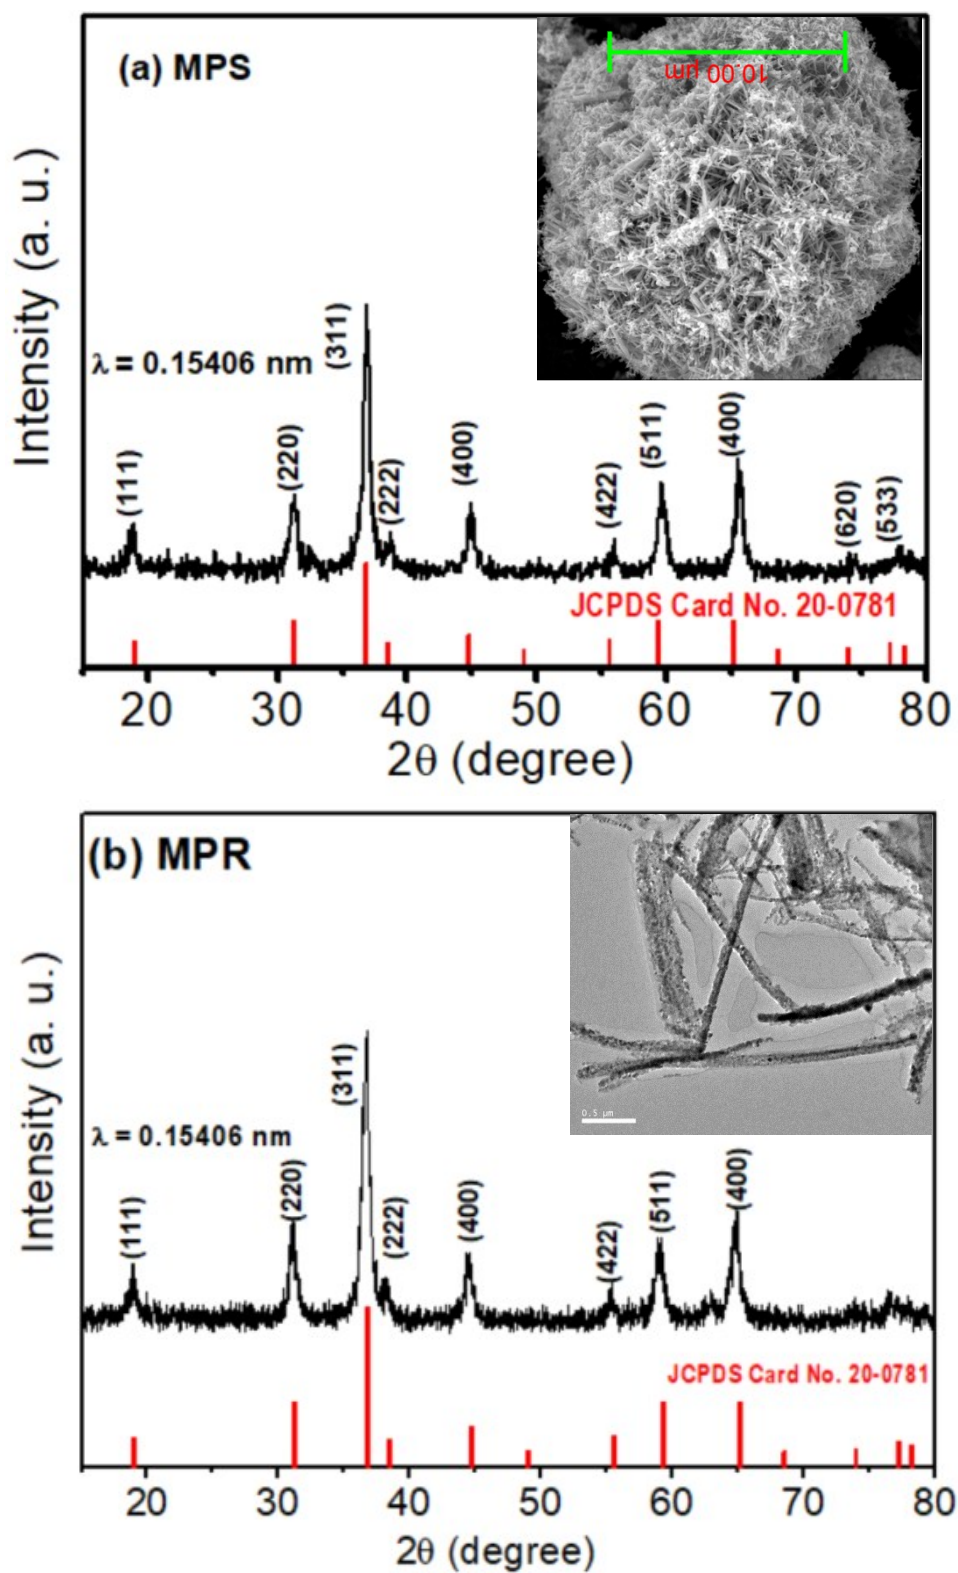

**Figure S1:** (a) XRD pattern

of 3D highly porous  $Zn_{0.2}Ni_{0.8}Co_2O_4$  microspheres. FE-SEM image of  $Zn_{0.2}Ni_{0.8}Co_2O_4$  microspheres as the inset figure. (b) XRD pattern of mesoporous  $Zn_{0.2}Ni_{0.8}Co_2O_4$  1D rods. TEM image of  $Zn_{0.2}Ni_{0.8}Co_2O_4$  rods as the inset figure.

Fig. S2(a-b)

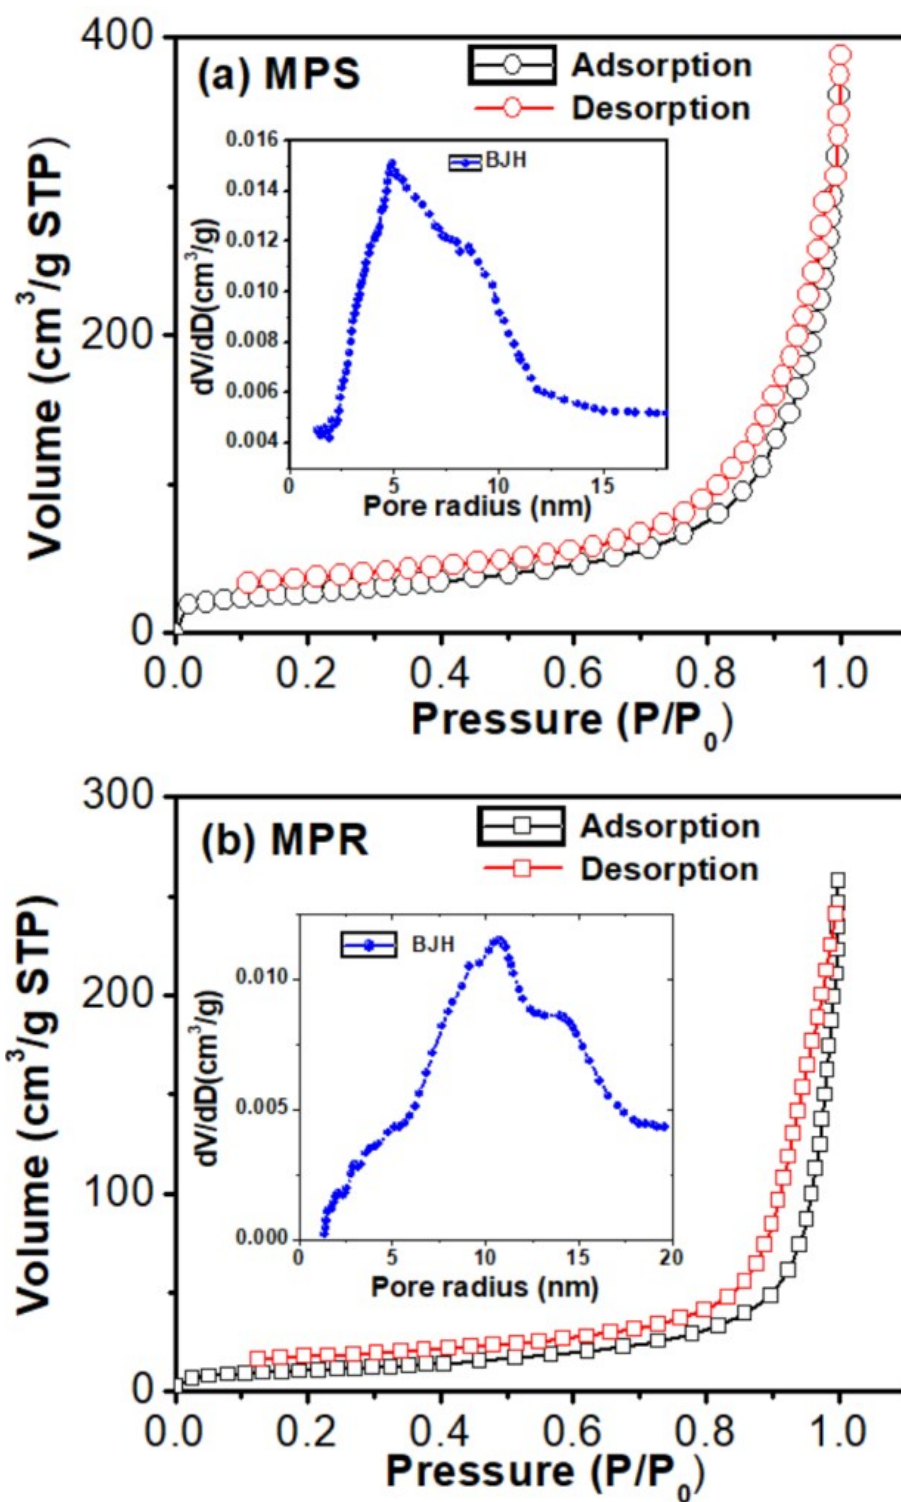

**Figure S2:** (a) N<sub>2</sub> adsorption–desorption isotherms and the corresponding pore size distribution (inset) of 3D highly porous Zn<sub>0.2</sub>Ni<sub>0.8</sub>Co<sub>2</sub>O<sub>4</sub> microspheres. (b) N<sub>2</sub> adsorption–desorption isotherms and the corresponding pore size distribution (inset) of mesoporous Zn<sub>0.2</sub>Ni<sub>0.8</sub>Co<sub>2</sub>O<sub>4</sub> rods

Fig. S3

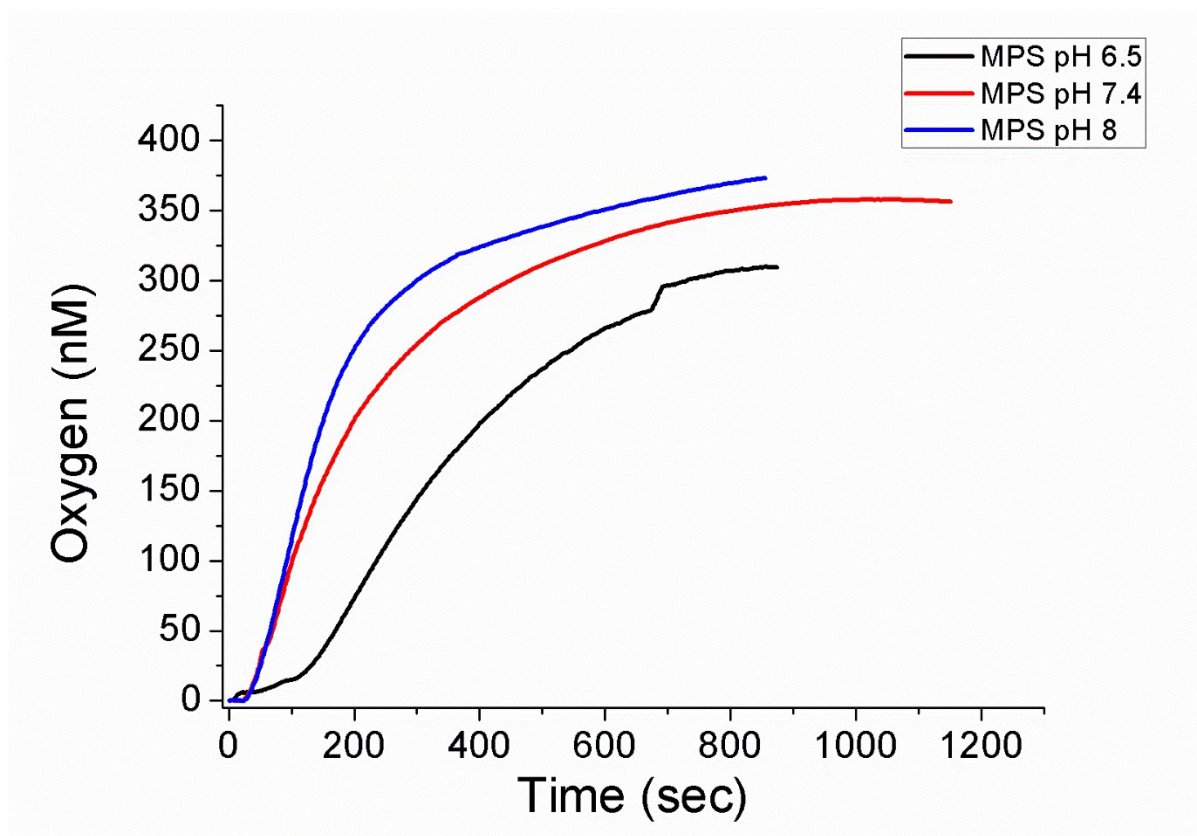

**Figure S3:** Oxygen evolution in the presence of **MPS** catalyst (3 mg in 2 mL) in different pH range; Ru(bpy)<sub>3</sub><sup>2+</sup> = 1 mM and Na<sub>2</sub>S<sub>2</sub>O<sub>8</sub> = 10 mM; Phosphate buffer (10 mM, pH 6.5); Phosphate buffer (10 mM, pH 7.4) and Phosphate buffer (10 mM, pH 8)

Fig. S4(a-b)

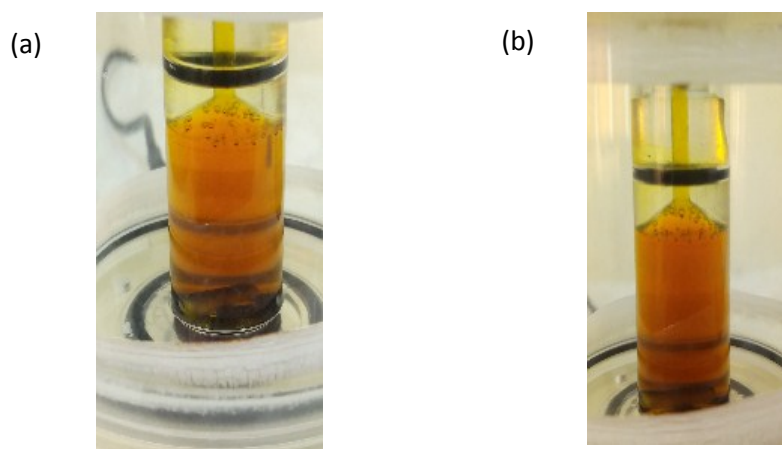

**Figure S4:** (a) Evolved oxygen in the gas phase with **MPS** (1 mg in 2 mL Phosphate buffer (10 mM, pH 7);  $\text{Ru}(\text{bpy})_3^{2+}$  = 1 mM and  $\text{Na}_2\text{S}_2\text{O}_8$  = 10 mM). (b) Evolved oxygen in the gas phase with **MPR** (3 mg in 2 mL Phosphate buffer (10 mM, pH 7);  $\text{Ru}(\text{bpy})_3^{2+}$  = 1 mM and  $\text{Na}_2\text{S}_2\text{O}_8$  = 10 mM).

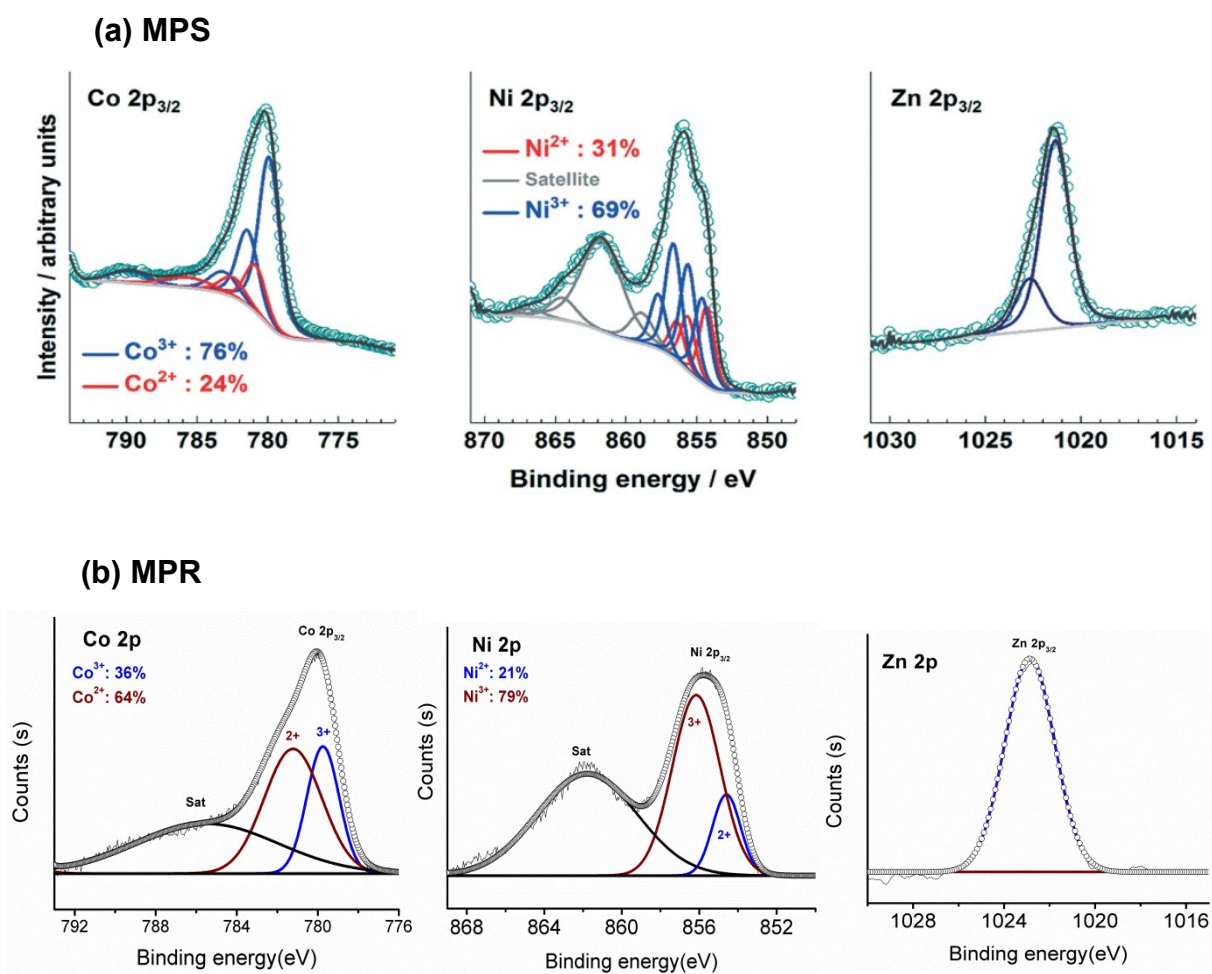

**Figure S5:** (a) Co 2p<sub>3/2</sub>, Ni 2p<sub>3/2</sub>, and Zn 2p<sub>3/2</sub> XPS spectra of **MPS**. (b) (a) Co 2p<sub>3/2</sub>, Ni 2p<sub>3/2</sub>, and Zn 2p<sub>3/2</sub> XPS spectra of **MPR**.



Fig. S6(a-b)

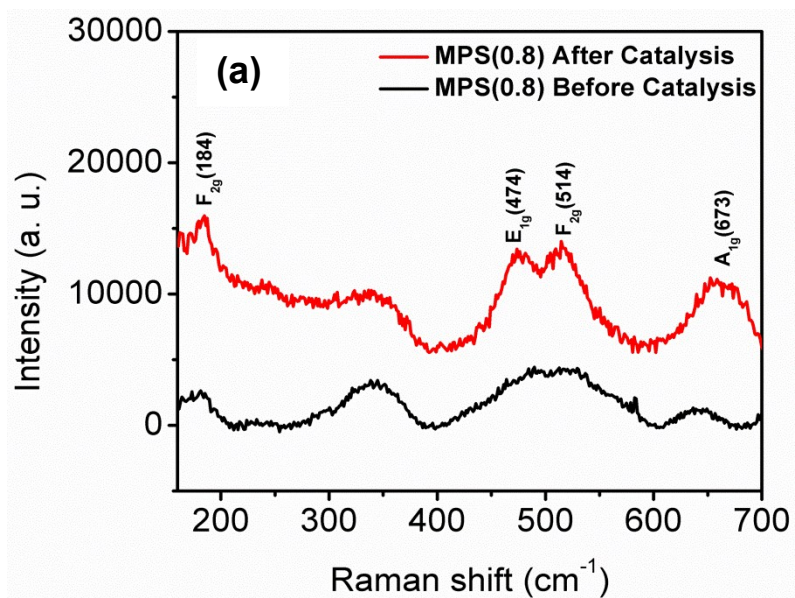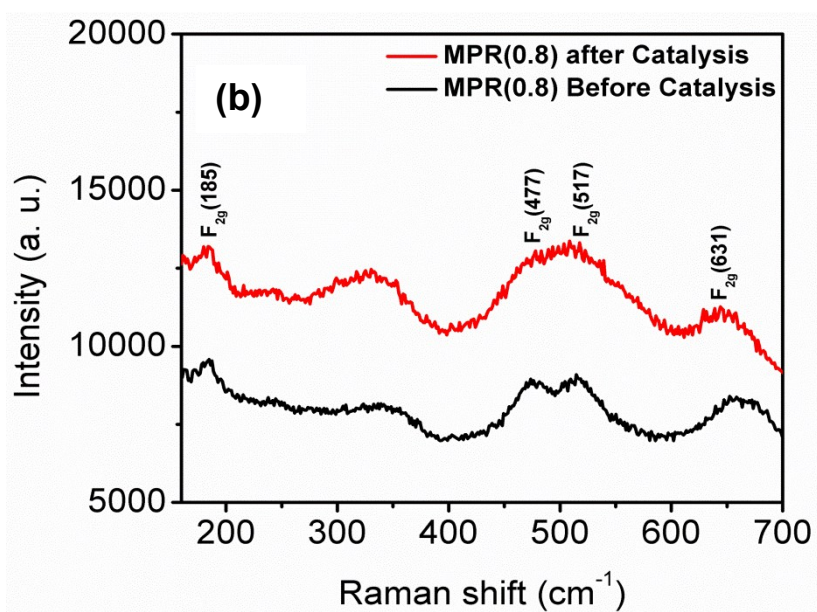

**Figure S6:** (a) Raman spectra of **MPS** before and after the water oxidation reaction (after the 1st and 5th catalytic cycle). (b) Raman spectra of **MPR** before and after the water oxidation reaction (after the 1st and 5th catalytic cycle).
